# Supplementary material for: Relationship between the sub-micron fraction (SMF) and fine-mode fraction (FMF) in the context of AERONET retrievals
Source: Copernicus journal article supplement (doi:10.5194/amt-16-1103-2023), 2023-03-03
Supplement: Supplementary file 1 [file amt-16-1103-2023-supplement.zip]

Archive with 3 entries (3 files):
- Supplementary_material_figure_captions.pdf
- Supplementary_material_figures.pdf
- amt-16-1103-2023-supplement-title-page.pdf
