# Supplementary material for: Relationship between the sub-micron fraction (SMF) and fine-mode fraction (FMF) in the context of AERONET retrievals
Source: Copernicus journal article supplement (doi:10.5194/amt-16-1103-2023), 2023-03-03
Supplement: Supplementary file 1 [file amt-16-1103-2023-supplement.zip › amt-16-1103-2023-supplement-title-page.pdf]

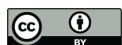

*Supplement of*

**Relationship between the sub-micron fraction (SMF) and fine-mode fraction (FMF) in the context of AERONET retrievals**

**Norman T. O'Neill et al.**

*Correspondence to:* Norman T. O'Neill ([norman.t.oneill@usherbrooke.ca](mailto:norman.t.oneill@usherbrooke.ca))

- [amt-16-1103-2023-supplement-title-page.pdf](#)
- [Supplementary\\_material\\_figure\\_captions.pdf](#)
- [Supplementary\\_material\\_figures.pdf](#)

The copyright of individual parts of the supplement might differ from the article licence.
