# Supplementary material for: Relationship between the sub-micron fraction (SMF) and fine-mode fraction (FMF) in the context of AERONET retrievals
Source: Copernicus journal article supplement (doi:10.5194/amt-16-1103-2023), 2023-03-03
Supplement: Supplementary file 1 [file amt-16-1103-2023-supplement.zip › Supplementary_material_figure_captions.pdf]

### Figure captions (supplementary material)

**Figure S1:**  $\eta'$  vs  $\eta$  (SMF vs FMF) scattergrams for the sites of Solar Village, Midway Island and Forth Crete and the Arctic sites of Barrow, Thule and PEARL (see Table 1 for site and aerosol classification details). These scattergrams and those of Figure A2 (in Appendix A of the main text) complement the scattergrams of Figure 6 in the main text (they complete the list of sites given in Table 1).

**Figure S2:** Seasonal  $r_0$  histograms and associated statistics for Barrow (Level 1.5 retrievals for the same period as that listed in Table 1). Level 1.5 retrievals were employed because there was virtually no Level 2.0 data.
